# Molecular analysis of the bacterial community in a continental high-temperature and water-flooded petroleum reservoir

Hui Li<sup>1</sup>, Shi-Zhong Yang<sup>1</sup>, Bo-Zhong Mu<sup>1</sup>, Zhao-Feng Rong<sup>2</sup> & Jie Zhang<sup>2</sup>

<sup>1</sup>Institute of Applied Chemistry and <sup>2</sup>Institute of Bioengineering, East China University of Science and Technology, Shanghai, China

**Correspondence:** Bo-Zhong Mu, Institute of Applied Chemistry, East China University of Science and Technology, Shanghai 200237, China. Tel.: +86 21 64252063; fax: +86 21 64252485; e-mail: bzmu@ecust.edu.cn

Received 8 November 2005; revised 4 January 2006; accepted 11 January 2006.  
First published online 15 February 2006.

doi:10.1111/j.1574-6968.2006.00149.x

Editor: J.C. Murrell

## Keywords

petroleum reservoir; 16S rRNA gene diversity; restriction fragment length polymorphism; bacterial community; clone library.

## Abstract

Water from a continental high-temperature, long-term water-flooded petroleum reservoir in Huabei Oilfield in China was analysed for its bacterial community and diversity. The bacteria were characterized by their 16S rRNA genes. A 16S rRNA gene clone library was constructed from the community DNA, and using restriction fragment length polymorphism analysis, 337 randomly selected clones were clustered with 74 operational taxonomic units. Sequencing and phylogenetic analyses showed that the screened clones were affiliated with *Gammaproteobacteria* (85.7%), *Thermotogales* (6.8%), *Epsilonproteobacteria* (2.4%), low-G+C Gram-positive (2.1%), high-G+C Gram-positive, *Betaproteobacteria* and *Nitrospira* (each < 1.0%). Thermophilic bacteria were found in the high-temperature water from the flooded petroleum reservoir, as well as mesophilic bacteria such as *Pseudomonas*-like clones. The mesophilic bacteria were probably introduced into the reservoir as it was being exploited. This work provides significant information on the structure of bacterial communities in high-temperature, long-term water-flooded petroleum reservoirs.

## Introduction

The environment of deep subsurface petroleum reservoirs is generally characterized by a high temperature (up to 180 °C), high pressure (up to 40 MPa), high salinity (up to 20 g L<sup>-1</sup> total dissolved solids) and by anaerobic systems with multi-phase fluids of oil, gas and water. Recently, much attention has been paid to the microorganisms which inhabit this environment due to their possible application in industrial processes. Over the last decade, a body of convergent observations has highlighted the great diversity of indigenous microorganisms in subsurface petroleum reservoirs, as well as in the exogenous microorganisms introduced to reservoirs in drilling operations and from water flooding in oil exploitation (Stetter *et al.*, 1993). These various aerobic and anaerobic groups of microorganism are able to degrade oil hydrocarbons and to synthesize such oil-releasing agents as fatty acids, alcohols, polysaccharides and biosurfactants. The technology known as microbial enhanced oil recovery has been applied by either the injection of selected microorganisms with their nutrients into the target petroleum reservoir, or simply the injection of microbial nutrients into the target reservoir to stimulate those indigenous microorganisms that have an oil-releasing

capacity. Laboratory investigations and field trials, in close collaboration with the petroleum industry, have indicated that the *in situ* biophysical and biochemical activities of these microorganisms, as well as their viability, has contributed to an enhancement of oil recovery. To understand these activities, a knowledge of the structure of microbial communities in subsurface petroleum reservoirs is of great importance.

Using traditional culture-dependent approaches many different species of microorganisms have been found in subsurface petroleum reservoirs, including sulfate reducers (Nilsen *et al.*, 1996; Rueter *et al.*, 1994), sulfidogens (L'Haridon *et al.*, 1995; Magot *et al.*, 2000), hydrocarbon-oxidizing bacteria (Nazina *et al.*, 2001), fermentative microorganisms (Grassia *et al.*, 1996; Van Hamme *et al.*, 2003), methanogens (Nilsen & Torsvik, 1996), manganese and iron reducers (Rees *et al.*, 1995; Greene *et al.*, 1997; Slobodkin *et al.*, 1999), and acetogens (Davydova-Charakhch'yan *et al.*, 1993). Nevertheless, our knowledge of the microbial diversity and community structure of these particular subsurface ecosystems is still limited, since many of the microorganisms in these ecosystems are 'non-culturable'. An application of various molecular techniques has allowed a more complete characterization of them, and evidence has increasingly

indicated that culture-independent techniques, in particular the analysis of retrieved 16S rRNA genes, are effective in characterizing complex microbial assemblages in environmental samples (Amann *et al.*, 1995). Molecular methods based on reverse sample genome probing, dot-blot DNA hybridization with functional gene probes and 16S rDNA analysis have been applied in identifying sulfate-reducing bacterial populations inhabiting a low-temperature water-flooded of western Canadian harboring reservoir (Voor-douw *et al.*, 1992, 1996). Both 16S rRNA gene phylogenetic analysis and enrichment culture techniques have recently been used to characterize thermophilic microbial assemblages in the Miocene Monterey formation, a prominent high-temperature, oil-bearing formation in California (Orphan *et al.*, 2000). In contrast, a parallel measurement using culture-based enrichments, 16S rRNA gene sequence analysis and oligonucleotide matrix array hybridization methods was carried out to investigate the microbial groups encompassing key genera of thermophilic bacteria and archaea of a continental high-temperature oil reservoir in Western Siberia, Russia (Bonch-Osmolovskaya *et al.*, 2003). A comparable study of the microbial community in a low-temperature, low-salinity and biodegraded petroleum reservoir from a Western Canadian Sedimentary Basin has been reported, which employed a multidisciplinary approach including chemical and geochemical examinations, biodegradation studies, and culture-based and 16S rRNA gene analyses (Grabowski *et al.*, 2005).

In this paper we used an rRNA approach – the cloning and sequencing of 16S rRNA gene fragments – to analyze bacterial communities and their proportions in a continental high-temperature, water-flooded petroleum reservoir in the J-12 Unit at Huabei Oilfield, Hebei Province, China. The J-12 Unit has been in primary production since March 1987. Flooding of the reservoir began in May 1988 and from that time on, it has been continuously flooded by the recycling of production water from the reservoir.

## Materials and methods

### Sample collection and DNA extraction

The samples of production water were directly collected in sterile steel screw-cap bottles from a sampling valve at the pipeline of the well head in May 2005. The bottles, which were completely filled with the production water (an oil/water mixture), were sealed from contamination and immediately taken to the laboratory where they were stored at 4 °C before concentration. The *in-situ* temperature and pressure of the target reservoir were about 75 °C and 18 MPa, respectively. The salinity of the groundwater in oil-bearing formations at a depth of 1500–1700 m in the reservoir was 16 622 mg L<sup>-1</sup>.

The oil in the water samples was removed by heating the samples to 70 °C for 15 min, followed by phase separation in a 2 L sterile separation funnel. The microbial biomass was collected from approximately 1 L of the water phase by centrifugation at 15 000 g, at 4 °C. Total community DNA was extracted from the cell pellets using a lysozyme/proteinase K/sodium dodecyl sulfate (SDS) treatment, followed by standard phenol/chloroform extractions (Murray *et al.*, 1998). Nucleic acids were purified with a DNA purification kit (V-gene, China).

### 16S rRNA gene library construction and RFLP analysis

Bacterial 16S rRNA genes were amplified from total community DNA by PCR using the combination of a bacterial primer 27f (5'-AGA GTT TGA TCC TGG CTC AG-3') and universal primer 1492r (5'-GGT TAC CTT GTT ACG ACT T-3') (Lane, 1991). The PCR was performed with a 'reconditioning PCR' program (Thompson *et al.*, 2000) and the amplified products were purified (Sambrook & David, 2001) and cloned with a T-vector (Takara, Japan).

Insert DNA was reamplified with pUC universal primers and subjected to restriction fragment length polymorphism (RFLP) by separate enzymatic digestion (Gisele *et al.*, 1994) with *HinfI* and *HaeIII* restriction endonucleases. Clones which showed an identical RFLP pattern were clustered as an operational taxonomic unit.

### Sequencing and phylogenetic analysis

One to three representative clones from each unique OTU were selected for sequencing. Insert DNA was sequenced on an automated ABI 377 sequencer (Dye-Terminator Cycle Sequencing Ready Reaction FS Kit; PE Applied Biosystems) using M13 universal primers. Chimeras were checked with the Chimera-Check program (Cole *et al.*, 2003) from the Ribosomal Database Project II (<http://rdp.cme.msu.edu/>). The sequences were initially submitted to GenBank at the NCBI (<http://www.ncbi.nlm.nih.gov>), using the BLAST network service (Altschul *et al.*, 1997) and FASTA program (version 3) (Pearson & Lipman, 1988) to determine their closest phylogenetic relatives. Sequences that differed by less than 3% were considered to belong to the same phylotype (Stackebrandt & Goebel, 1994), and each phylotype was represented by a sequence type. Sequences were aligned to their nearest neighbor using Clustal X software (Thompson *et al.*, 1997). Phylogenetic trees were constructed based on the Kimura two-parameter model (Kimura, 1980) and neighbor-joining algorithm (Saitou & Nei, 1987) using the Phylip package (Felsenstein, 2005). Bootstrap analysis with 1000 replicates was applied to assign confidence levels to the nodes in the trees.

## Nucleotide sequence accession numbers

The GenBank accession numbers for the rDNA sequences are as follows: HBO1–HBO23, DQ201206–DQ201228; HBO25–HBO33, DQ201229–DQ201237; HBO35–HBO45, DQ201238–DQ201248; HBO46, DQ240873; HBO47, DQ201249; HBO48, DQ223058; HBO49–HBO61, DQ201250–DQ201262; HBO62–HBO68, DQ223044–DQ223050; HBO69, DQ223052; HBO70, DQ223051; and HBO71–HBO75, DQ223053–DQ223057.

## Results

A total of 337 clones were characterized by PCR as having the correct insert DNA. The RFLP analysis showed that all of the clones fell into 74 OTUs, with four predominant OTUs accounting for 73.6% of the gene library. The remaining 70 OTUs were presented at low levels, of which 57 OTUs were represented by a single clone. A comparative analysis of the retrieved sequences showed that all the clones were clustered within the domain Bacteria. The phylogenetic analysis indicated that most sequence types had relatively high levels of similarity with their closest counterparts in the public databases (Table 1). Our phylogenetic analysis placed the 69 HBO (Huabei Oilfield) sequence types into the following groups of the domain Bacteria: *Gammaproteobacteria*, *Thermotogales*, *Epsilonproteobacteria*, low-G+C Gram-positive, high-G+C Gram-positive, *Betaproteobacteria*, and *Nitrospira*.

### *Gammaproteobacteria*

A total of 289 clones, represented by 48 sequence types and accounting for 85.7% of the gene library, fell into the *Gammaproteobacteria* group (Table 1, Fig. 1). Of which 272 clones, represented by 40 sequence types and accounting for 80.7% of the gene library, were related (> 92.8% identity) to *Pseudomonas* bacteria, and 16 clones represented by

**Table 1.** Distribution of sequence types from the bacterial 16S rRNA gene library

| Putative division            | No. of RFLP patterns | No. of sequence types | Similarity (%) <sup>*</sup> | No. of clones (%) <sup>†</sup> |
|------------------------------|----------------------|-----------------------|-----------------------------|--------------------------------|
| High-G+C Gram-positive       | 1                    | 1                     | 98.5                        | 3 (< 1)                        |
| Low-G+C Gram-positive        | 5                    | 5                     | 93.0–97.6                   | 7 (2.1)                        |
| <i>Nitrospira</i>            | 1                    | 1                     | 93.6                        | 1 (< 1)                        |
| <i>Thermotogales</i>         | 3                    | 3                     | 92.8–96.1                   | 24 (6.8)                       |
| <i>Betaproteobacteria</i>    | 1                    | 1                     | 100                         | 1 (< 1)                        |
| <i>Epsilonproteobacteria</i> | 7                    | 7                     | 93.8–100                    | 8 (2.4)                        |
| <i>Gammaproteobacteria</i>   | 55                   | 50                    | 70.9–100                    | 290 (85.7)                     |

<sup>\*</sup>Percentage of 16S rRNA gene similarity to its closest relative.

<sup>†</sup>Proportion of clones in the library.

seven sequence types and accounting for 4.5% were related (> 99% identity) to *Serratia* bacteria.

The most abundant sequence type in this group, as well as in the gene library, HBO45, displaying 176 clones and accounting for 52.3% of the library, was closely related (100% identity) to *Pseudomonas* sp. PDB (Fig. 1), a chlorate-respiring bacterium retrieved from the Pennsylvania State University wastewater treatment plant (Logan *et al.*, 2001). The second most abundant sequence type, HBO46, including 52 clones and accounting for 15.4%, was closely related to *Pseudomonas* sp. BWDY-9 (DQ200852) with 97.9% similarity, a cultivated species isolated from Yellow River estuary. Representing three clones, the sequence type HBO50 was highly related (98.4% identity) to the uncultured bacterium O1 (AY770933), a clone from a production well of the Dagang oilfield in China.

### *Epsilonproteobacteria*

Seven sequence types, representing eight clones and accounting for 2.4% of the gene library, were clustered within the *Epsilonproteobacteria* group. The similarities of these phylotypes to previously determined rRNA gene sequences were greater than 93%. Six of clones were related to uncultivated species and the remaining two were related to cultivated bacterial clones of the genera *Wolinella* and *Campylobacter* (Table 1).

The sequence types HBO3, HBO38 and HBO43, each representing one clone, were closely related (98% identity) to the uncultured bacterial clones PL-5B5, PL-28B12 and PL-14B3, respectively (Table 2, Fig. 2), which had previously been recovered from the production waters of a non-water-flooded low-temperature and low-salinity petroleum reservoir in Canada (Elizaveta *et al.*, 2003). The sequence type, HBO75, only one clone, was identical (100% identity) to the uncultured bacterium clone CCSD DF2030 B20, a clone which had been recovered from ultra-high-pressure rocks and drilling fluids from the Chinese Continental Scientific Drilling Project (Zhang *et al.*, 2005).

### Low-G+C Gram-positive

Seven clones, represented by five sequence types and accounting for 2.1% of the gene library, were clustered within low-G+C Gram-positive bacteria (Table 1, Fig. 2). Three clones, represented by HBO65, which was the most abundant sequence type in this group, were closely related (97.6% identity) to *Thermoanaerobacter* sp. SL9 (AY216597), a thermophilic anaerobic bacterial clone recovered from an oil reservoir in France. The HBO68 sequence type, displaying one clone, was 96% similar to the rRNA gene of *Thermoanaerobacter* sp. MET-G (AY800104), a novel species of the genus *Thermoanaerobacter* isolated from an oilfield in France. No cultivated bacterial members were

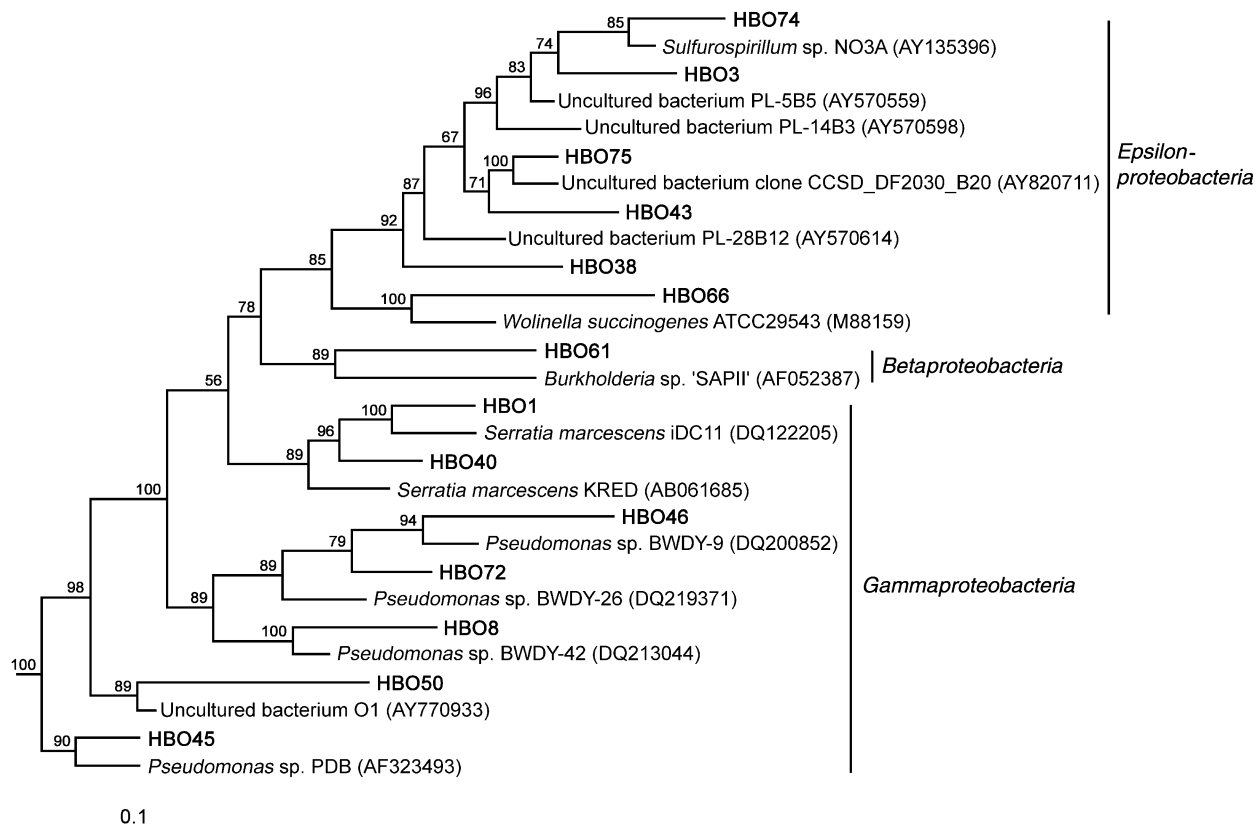

**Fig. 1.** Phylogenetic tree of the Gammaproteobacteria, Betaproteobacteria and Epsilonproteobacteria 16S rRNA gene phylotypes of HBO sequence types (shown in bold) and closely related sequences from the GenBank database. Putative divisions are listed to the right. To save space, only the major clades of *Pseudomonas*-related clones (data not shown) are used to construct the phylogenetic tree. Bootstrap values (1000 replicates) of  $\geq 50\%$  are reported. The topology shown was that obtained with the neighbor-joining method. The scale bar represents the number of changes per nucleotide position. *Clostridium formicaceticum* (X77836) and *Clostridium aminobutyricum* (X76161) were used as the outgroups.

found for HBO28. It represented one clone that was closely related (96.6% identity) to the uncultured *Thermovenabulum* sp. B8-otu12 (DQ097677), an anaerobic microorganism found in the high-temperature regions of the Dagang oilfield in China.

### Thermotogales

A total of 23 clones, represented by two sequence types and accounting for 6.8% of the gene library, clustered with the *Thermotogales* group (Table 1, Fig. 2). Sequence type HBO69, including 20 clones and holding 5.9%, exhibited a 93.6% similarity to *Thermotoglaes hypogea* SEBR 7054, a thermophilic, strictly anaerobic and rod-shaped bacterium isolated from an African oil-producing well (Fardeau *et al.*, 1997).

### Others

Three clones displayed by the single sequence type, HBO70, clustered with the high-G+C Gram-positive group (Table 1). They were closely related (98.5% identity) to *Mycobac-*

*terium massiliense* CCUG 48898 (Fig. 2), a strain isolated from a pure culture of the sputum and bronchoalveolar fluid of a hospital patient (Adékambi *et al.*, 2004). One clone, represented by HBO60, was grouped with the *Nitrospira* (Table 1). Its phylotype was related (93.6% identity) to *Thermodesulfobivrio* sp. TGL-LS1 (AB021302) (Fig. 2), a Gram-negative thermophilic sulfate-reducing bacterial clone recovered from thermophilic anaerobic wastewater treatment processes. One clone, represented by the single sequence type HBO61, clustered with the *Betaproteobacteria* (Table 1). Its rDNA phylotype was 100% identical to a previously determined rDNA sequence from *Burkholderia* sp. SAPII (AF052387) (Fig. 1), a bacterial clone isolated from the hepatopancreatic symbionts in the freshwater isopod, *Asellus aquaticus*.

### Discussion

Representation of the domain Bacteria included 68 sequence types distributing to seven bacterial divisions. Some microorganisms in this study are identical to those previously

**Table 2.** Closest relatives isolated from the oilfield

| Type (accession no.) | Clone no. | Phylogenetically closest related organism (accession no.) | Similarity (%)* | Origin                                  |
|----------------------|-----------|-----------------------------------------------------------|-----------------|-----------------------------------------|
| HBO68 (DQ223050)     | 1         | <i>Thermoanaerobacter</i> sp. MET-G (AY800104)            | 96              | Oilfield in France                      |
| HBO65 (DQ223047)     | 3         | <i>Thermoanaerobacter subterraneus</i> SL9 (AY216597)     | 97.6            | Oilfield in France                      |
| HBO69 (DQ223052)     | 20        | <i>Thermotoga hypogea</i> (T) SEBR 7054 (U89768)          | 93.6            | Oilfield in Africa                      |
| HBO43 (DQ201246)     | 1         | Uncultured bacterium clone PL-14B3 (AY570598)             | 98              | Oilfield in Canada                      |
| HBO38 (DQ201241)     | 1         | Uncultured bacterium clone PL-28B12 (AY570614)            | 98              | Oilfield in Canada                      |
| HBO3 (DQ20120)       | 1         | Uncultured bacterium clone PL-5B5 (AY570559)              | 98              | Oilfield in Canada                      |
| HBO50 (DQ201215)     | 3         | Uncultured bacterium O1 (AY770933)                        | 98.4            | Oilfield in China                       |
| HBO28 (DQ201232)     | 1         | <i>Thermovenabulum</i> sp. B8-otu12 (DQ097677)            | 96.6            | High-temperature oil reservoir in China |

\*Percentage of 16S rRNA gene similarity to its closest relative.

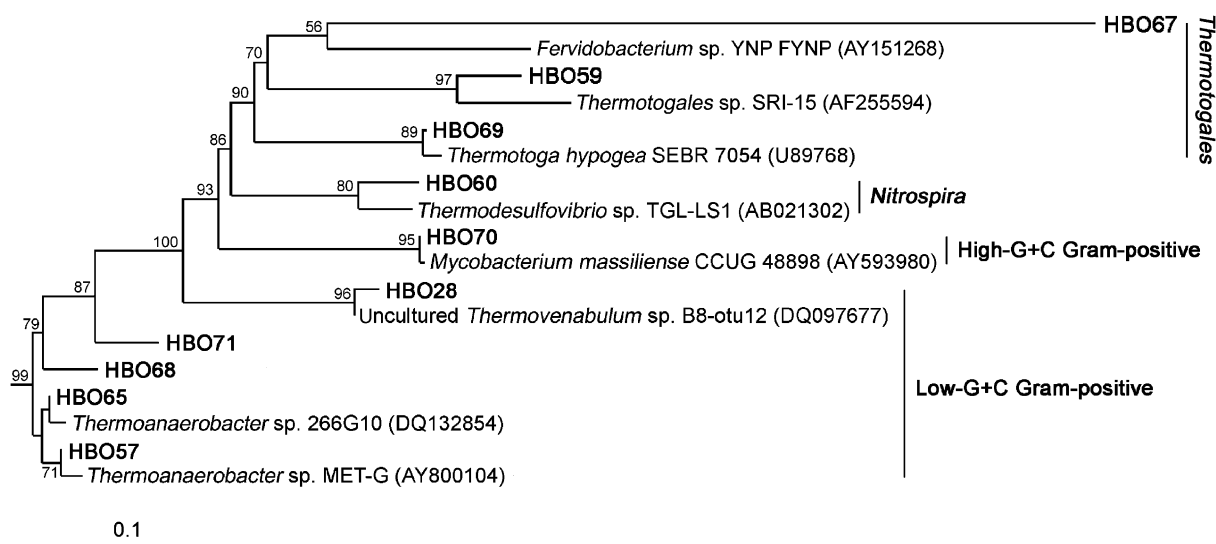

**Fig. 2.** Phylogenetic tree of the *Thermotogales*, low-G+C Gram-positive, high-G+C Gram-positive and *Nitrospira* 16S rRNA gene phylotypes of HBO sequence types (shown in bold) and closely related sequences from the GenBank database. Putative divisions are listed on the right. Bootstrap values (1000 replicates) of  $\geq 50\%$  are reported as percentages. The topology shown was that obtained with the neighbor-joining method. The scale bar represents the number of changes per nucleotide position. *Thermococcus litoralis* (Z70252) and *Methanothermobacter thermoautotrophicum* (X05482) were used as the outgroups.

reported from other oilfields, while others are different (Orphan *et al.*, 2000; Bonch-Osmolovskaya *et al.*, 2003; Grabowski *et al.*, 2005). The differences are probably due to the highly heterogeneous geological and physical conditions of the petroleum reservoir studied, which may also select for physiologically diverse assemblages of microorganisms.

Nine types clustering within known thermophilic groups included the low-G+C Gram-positive *Thermotogales* and

*Nitrospira*, which have previously been isolated from a number of high-temperature petroleum reservoirs worldwide (Orphan *et al.*, 2000; Bonch-Osmolovskaya *et al.*, 2003), suggesting that these thermophiles may be a common component of geothermally heated specialized subsurface environments and probably play a role in the trophic web of these ecosystems. In addition, eight sequence types were associated with clones previously screened from seven

oilfields across the world. The wide spread of these eight types within different petroleum reservoirs indicates that they may be an indigenous bacteria to petroleum reservoirs and may have a significant impact on oil reservoir geochemistry.

Many sequence types were closely related to the *Pseudomonas*-like clones found in other oilfields (Orphan *et al.*, 2000). These phylotypes are not likely to be derived from thermophilic microorganisms, and may be representative of mesophilic microorganisms, although this petroleum system is characterized by a high-temperature. The water flooding of our petroleum reservoir has been continuous for 17 years, which implies that it is an open system. The injection water was recycled from the water produced from the reservoir and was not sterile during this operation; therefore a number of microorganisms originally present in the surface environment may have been introduced into the reservoir along with the re-injected water. Some bacterial cells will not lyse in the formation water and some microorganisms may remain in the cooler portions of the reservoir, such as in the bottoms of injection wells, or along the wall of production wells (Orphan *et al.*, 2000).

Molecular analysis is a useful tool in any investigation of the microbial ecosystems of oil pools, since the species involved in this environment cannot be easily isolated using conventional methods. However, a previous study indicated that the intensive use of molecular techniques would introduce biases (Suzuki & Giovannoni, 1996; von Wintzingerode *et al.*, 1997). Any deficiency in the DNA extraction step may result in members of the Gram-positive bacteria accounting for a smaller fraction, which is probably the reason for the small fraction of high-G+C Gram-positive, low-G+C Gram-positive and *Thermotogales* groups in our study. In addition, a number of mesophilic microorganisms such as the *Pseudomonas*-like clones in the production water did not seem to be consistent with the high temperature and extreme conditions present, which implies that our current knowledge of the microbial diversity in such an ecosystem is limited and further study is still necessary. Nevertheless, an analysis of the rRNA gene sequences we retrieved reveals an insight into the bacterial community of high-temperature, long-term water-flooded petroleum reservoirs, and our results will contribute to the promotion of applications in microbially-enhanced oil recovery.

## Acknowledgements

This work was supported by the National Natural Science Foundation of China (50374038, 50574040), the Ministry of Education of China (20030251002, 03071) and the Shanghai Municipal Science and Technology Commission (045407017).

## References

- Adékambi T, Reynaud-Gaubert M, Greub G, Gevaudan MJ, La SB, Raoult D & Drancourt M (2004) Amoebal coculture of '*Mycobacterium massiliense*' sp. nov. from the sputum of a patient with hemoptoic pneumonia. *J Clin Microbiol* **42**: 5493–5501.
- Altschul SF, Thomas LM, Alejandro AS, Zhang JH, Zhang Zh, Webb M & David JL (1997) Gapped BLAST and PSI-BLAST: a new generation of protein database search programs. *Nucleic Acids Res* **25**: 3389–3402.
- Amann RI, Ludwig W & Schleifer KH (1995) Phylogenetic identification and in situ detection of individual microbial cells without cultivation. *Microbiol Rev* **59**: 143–169.
- Bonch-Osmolovskaya EA, Miroshnichenko ML, Lebedinsky AV, *et al.* (2003) Radioisotopic, culture-based, and oligonucleotide microchip analyses of thermophilic microbial communities in a continental high-temperature petroleum reservoir. *Appl Environ Microbiol* **69**: 6143–6151.
- Cole JR, Chai B, Marsh TL, *et al.* (2003) The Ribosomal Database Project (RDP-II): previewing a new autoaligner that allows regular updates and the new prokaryotic taxonomy. *Nucleic Acids Res* **31**: 442–443.
- Davydova-Charakhch'yan IA, Mileeva AN, Mityushina LL & Belyaev SS (1993) Acetogenic bacteria from oilfields of Tataria and Western Siberia. *Mikrobiologiya* **61**: 306–315.
- Fardeau ML, Ollivier B, Patel BK, Magot M, Thomas P, Rimbault A, Rocchiccioli F & Garcia JL (1997) *Thermotoga hypogea* sp. nov., a xylanolytic, thermophilic bacterium from an oil-producing well. *Int J Syst Bacteriol* **47**: 1013–1019.
- Felsenstein J (2005) *PHYMLIP: Phylogeny Inference Package*, Version 3.65. University of Washington, Seattle, WA.
- Gisele L, Marie-reine A, Françoise R & Noelle A (1994) Rapid identification of rhizobia by restriction fragment length polymorphism analysis of PCR-amplified 16S rRNA genes. *Appl Environ Microbiol* **60**: 56–63.
- Grabowski A, Nercessian O, Fayolle F, Blanchet D & Jeanthon C (2005) Microbial diversity in production waters of a low-temperature biodegraded oil reservoir. *FEMS Microbiol Ecol* **54**: 424–433.
- Grassia GC, McLean KM, Glenat P, Bauld J & Sheehy A (1996) A systematic survey for thermophilic fermentative bacteria and archaea in high temperature petroleum reservoirs. *FEMS Microbiol Ecol* **21**: 47–58.
- Greene AD, Patel BKC & Sheehy AJ (1997) *Deferribacter thermophilus* gen. nov., sp. nov., a novel thermophilic manganese- and iron-reducing bacterium isolated from a petroleum reservoir. *Int J Syst Bacteriol* **47**: 505–509.
- Hugenholtz P, Pitulle C, Hershberger KL & Pace NR (1998) Novel division level bacterial diversity in a yellowstone hot spring. *J Bacteriol* **180**: 366–376.
- Kim YH & Cerniglia CE (2005) Influence of erythromycin A on the microbial populations in aquaculture sediment microcosms. *Aquat Toxicol* **73**: 230–241.

- Kimura M (1980) A simple method for estimating evolutionary rates of base substitutions through comparative studies of nucleotide sequences. *J Mol Evol* **16**: 111–120.
- Lane DJ (1991) 16S/23S rRNA sequencing. *Nucleic Acid Techniques in Bacterial Systematics* (Stackebrandt E & Goodfellow M, eds), pp. 115–175. Wiley, New York.
- L'Haridon S, Reysenbach AL, Glenat P, Prieur D & Jeanthon C (1995) Hot subterranean biosphere in a continental oil reservoir. *Nature* **377**: 223–224.
- Logan BE, Zhang H, Mulvaney P, Milner MG, Head IM & Unz RF (2001) Kinetics of perchlorate- and chlorate-respiring bacteria. *Appl Environ Microbiol* **67**: 2499–2506.
- Magot M, Ollivier B & Patel BK (2000) Microbiology of petroleum reservoirs. *Anton Leeuw* **77**: 103–116.
- Murray AE, Preston CM, Massana R, Taylor LT, Blakis A, Wu K & DeLong EF (1998) Seasonal and spatial variability of bacterial and archaeal assemblages in the coastal waters near Anvers Island, Antarctica. *Appl Environ Microbiol* **64**: 2585–2595.
- Nazina TN, Tourova TP, Poltarau AB, Novikova EV, Grigoriyan AA, Ivanova AE, Petrunyaka VV, Osipov GA, Belyaev SS & Ivanov MV (2001) Taxonomic study of aerobic thermophilic bacilli: descriptions of *Geobacillus subterraneus* gen. nov., sp. nov. and *Geobacillus uzensis* sp. nov. from petroleum reservoirs and transfer of *Bacillus stearothermophilus*, *Bacillus thermocatenulatus*, *Bacillus thermooleovorans*, *Bacillus kaustophilus*, *Bacillus thermoglucosidasius* and *Bacillus thermodenitrificans* to *Geobacillus* as the new combinations *G. stearothermophilus*, *G. thermocatenulatus*, *G. thermooleovorans*, *G. kaustophilus*, *G. thermoglucosidasius* and *G. thermodenitrificans*. *Int J Syst Evol Microbiol* **51**: 433–446.
- Nilsen RK & Torsvik T (1996) *Methanococcus thermolithotrophicus* isolated from North Sea oilfield reservoir water. *Appl Environ Microbiol* **62**: 728–731.
- Nilsen RK, Torsvik T & Lien T (1996) *Desulfotomaculum thermocisternum* sp. nov., a sulfate reducer isolated from a hot North Sea oil reservoir. *Int J Syst Bacteriol* **46**: 397–402.
- Orphan VJ, Taylor LT, Hafenbradl D & DeLong EF (2000) Culture-dependent and culture-independent characterization of microbial assemblages associated with high-temperature petroleum reservoirs. *Appl Environ Microbiol* **66**: 700–711.
- Pearson WR & Lipman DJ (1988) Improved tools for biological sequence comparison. *Proc Natl Acad Sci USA* **85**: 2444–2448.
- Rees GN, Grassia GS, Sheehy AJ, Dwivedi PP & Patel BKC (1995) *Desulfacinum infernum* gen. nov., sp. nov., a thermophilic sulfatereducing bacterium from a petroleum reservoir. *Int J Syst Bacteriol* **45**: 85–89.
- Rueter P, Rabus R, Wilkes H, Aeckersberg F, Rainey FA, Jannasch HW & Widdel F (1994) Anaerobic oxidation of hydrocarbons in crude oil by new types of sulphate-reducing bacteria. *Nature* **372**: 455–458.
- Saitou N & Nei M (1987) The neighbor-joining method: a method for constructing phylogenetic trees. *Mol Biol Evol* **4**: 406–425.
- Sambrook J & David WR (2001) *Molecular Cloning: A Laboratory Manual*, 3rd edn. Cold Spring Harbor Laboratory Press, New York.
- Slobodkin AI, Jeanthon C, L'Haridon S, Nazina TN, Miroschnichenko ML & Bonch-Osmolovskaya EA (1999) Dissimilatory reduction of Fe (III) by thermophilic bacteria and archaea in deep subsurface petroleum reservoirs of Western Siberia. *Curr Microbiol* **39**: 99–102.
- Stackebrandt E & Goebel BM (1994) Taxonomic note: a place for DNA-DNA reassociation and 16S rRNA sequence analysis in the present species definition in bacteriology. *Int J Syst Bacteriol* **44**: 846–849.
- Stetter KO, Huber R, Blochl E, Kurr M, Eden RD, Fielder M, Cash H & Vance I (1993) Hyperthermophilic archaea are thriving in deep North Sea and Alaskan oil reservoirs. *Nature* **365**: 743–745.
- Suzuki MT & Giovannoni SJ (1996) Bias caused by template annealing in the amplification of mixtures of 16S rRNA genes by PCR. *Appl Environ Microbiol* **62**: 625–630.
- Suzuki MT, Rappe MS & Giovannoni SJ (1998) Kinetic bias in estimates of coastal picoplankton community structure obtained by measurements of small-subunit rRNA gene PCR amplicon length heterogeneity. *Appl Environ Microbiol* **64**: 4522–4529.
- Thompson JD, Gibson TJ, Plewniak F & Higgins DG (1997) The CLUSTAL\_X windows interface: flexible strategies for multiple sequence alignment aided by quality analysis tools. *Nucleic Acids Res* **25**: 4876–4882.
- Thompson JR, Marcelino LA & Polz MF (2000) Heteroduplexes in mixed-template amplifications: formation, consequence and elimination by 'reconditioning PCR'. *Nucleic Acids Res* **30**: 2083–2088.
- Van Hamme JD, Singh Ajay & Ward OP (2003) Recent advances in petroleum microbiology. *Microbiol Mol Biol Rev* **67**: 503–549.
- Von Wintzingerode F, Gobel UB & Stackebrandt E (1997) Determination of microbial diversity in environmental samples: pitfalls of PCR-based rRNA analysis. *FEMS Microbiol Rev* **21**: 213–229.
- Voordouw G, Armstrong SM, Reimer MF, Fouts B, Telang AJ, Shen Y & Gevertz D (1996) Characterization of 16S rRNA genes from oilfield microbial communities indicates the presence of a variety of sulfate-reducing, fermentative, and sulfide-oxidizing bacteria. *Appl Environ Microbiol* **62**: 1623–1629.
- Voordouw G, Voordouw JK, Jack TR, Foght J, Fedorak PM & Westlake DWS (1992) Identification of distinct communities of sulfate-reducing bacteria in oilfields by reverse sample genome probing. *Appl Environ Microbiol* **58**: 3542–3552.
- Zhang GX, Dong HL, Xu ZQ, Zhao DG & Zhang CL (2005) Microbial diversity in ultra-high-pressure rocks and fluids from the Chinese Continental Scientific Drilling Project in China. *Appl Environ Microbiol* **71**: 3213–3227.
